# Supplementary material
Source: ML conference proceedings conference paper supplement (https://aclanthology.org/2026.semeval-1.365)

Valence Distribution Comparison

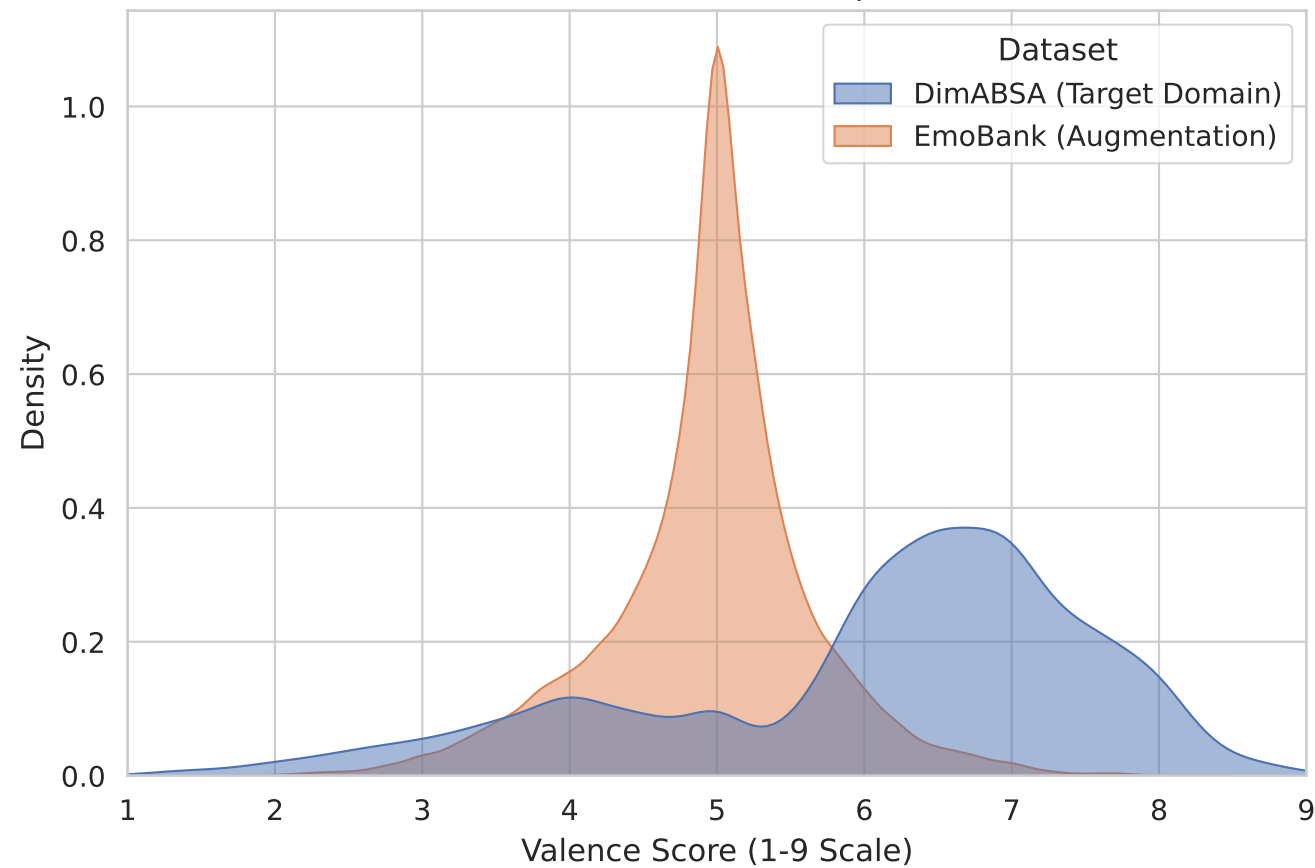

Arousal Distribution Comparison

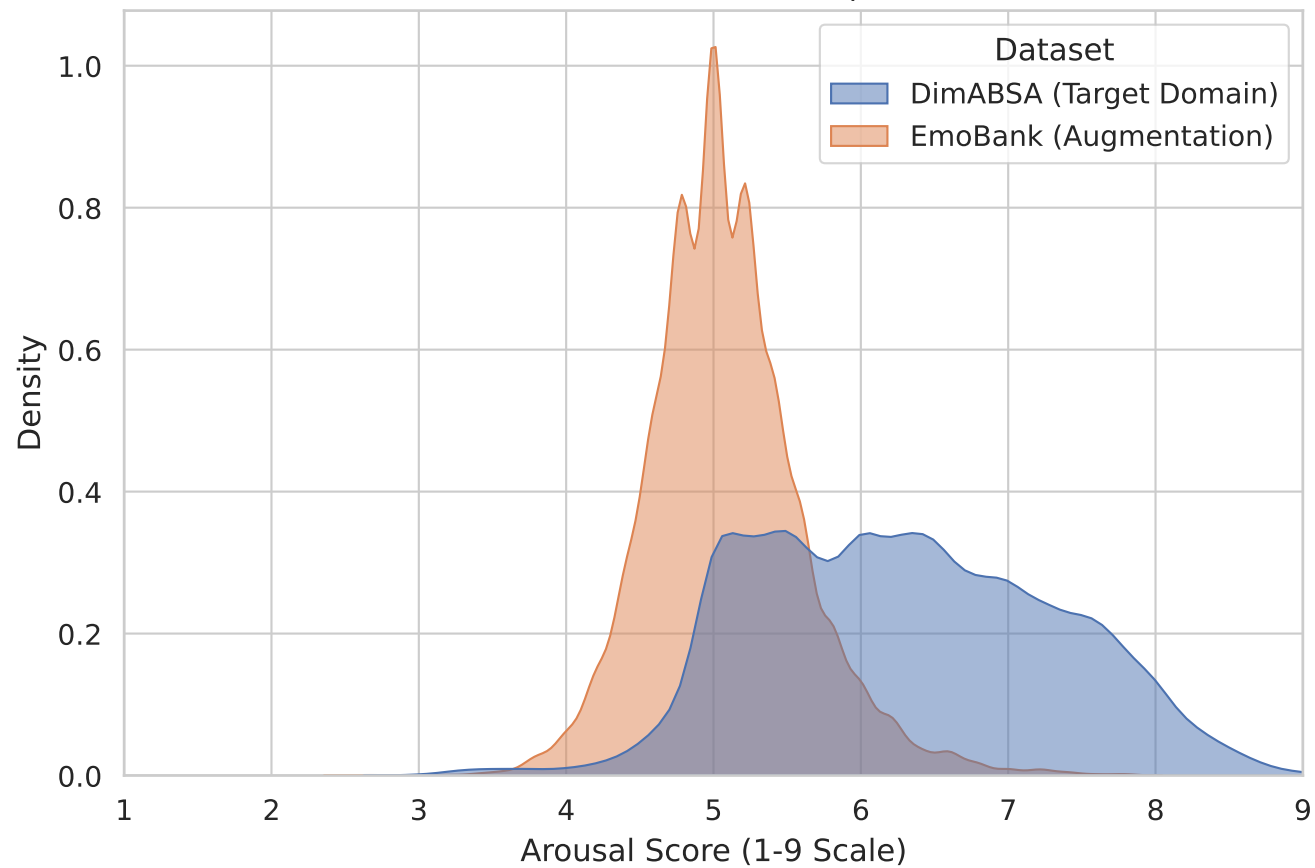

Supplement: SupplementaryMaterial [file Distribution_Overlay.pdf › Distribution_Overlay.pdf]

Distribution Shift: Aspect-Based vs. General Emotion Datasets

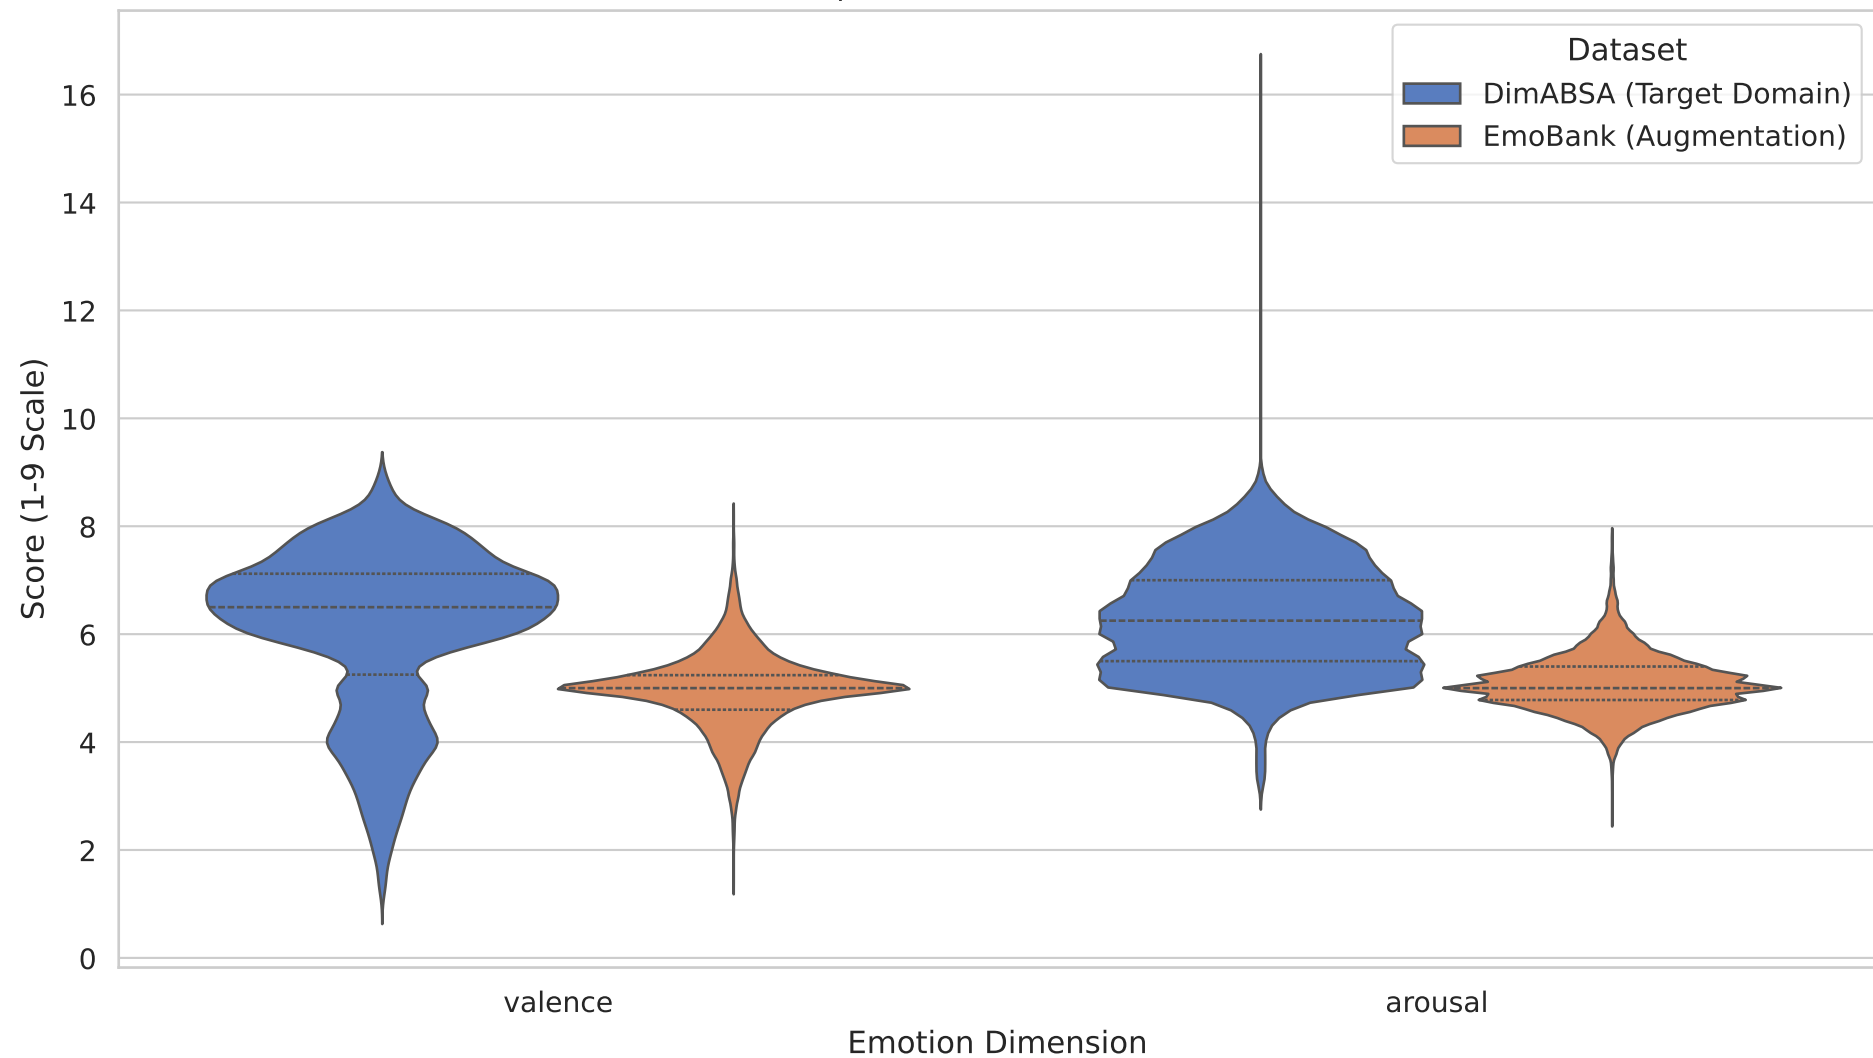

Supplement: SupplementaryMaterial [file Violin_Plot.pdf › Violin_Plot.pdf]
